# Supplementary material
Source: PubMed Central journal article supplement (PMC2990652)

## Supporting Information For:

### Formation of Deoxyguanosine Cross-links from Calf Thymus DNA Treated with Acrolein and 4-Hydroxy-2-nonenal

*Ivan D. Kozekov,<sup>†</sup> Robert J. Turesky,<sup>§\*</sup> Guillermo R. Alas,<sup>†</sup> Constance M. Harris,<sup>†</sup> Thomas M.  
Harris,<sup>†</sup> and Carmelo J. Rizzo<sup>†\*</sup>*

Departments of Chemistry and Biochemistry, and Center in Molecular Toxicology, Vanderbilt  
University, Nashville, TN 37235-1822 and Division of Environmental Health Sciences,  
Wadsworth Center, New York State Department of Health, Albany, NY 12201

#### Table of Contents

**Figure S1.** Calibration curves for AC and HNE monomeric and croslinked DNA adducts (pages S2-S5)

**Figure S2.** Reconstructed ion chromatograms of the LC-ESI/MS/MS<sup>n</sup> traces of the HNE-modified oligonucleotide duplex diluted with CT-DNA. Panel A: A reconstructed ion chromatogram of the LC-ESI/MS/MS<sup>3</sup> trace for HNE-dG and the reconstructed ion chromatogram of the LC-ESI/MS/MS<sup>4</sup> trace for the dG-HNE-dG cross-link in unmodified oligonucleotide duplex diluted with CT-DNA. Panel B: A reconstructed ion chromatogram of the LC-ESI/MS/MS<sup>3</sup> trace for HNE-dG and the reconstructed ion chromatogram of the LC-ESI/MS/MS<sup>4</sup> trace for the dG-HNE-dG cross-link-modified oligonucleotide duplex diluted with CT-DNA to a level of 1 adduct per 10<sup>6</sup> DNA bases. Both [<sup>2</sup>H<sub>11</sub>]-HNE-dG and [<sup>2</sup>H<sub>11</sub>]-dG-HNE-dG cross-link were added to CT DNA at a level of 1 adduct per 10<sup>7</sup> bases. (page S6)

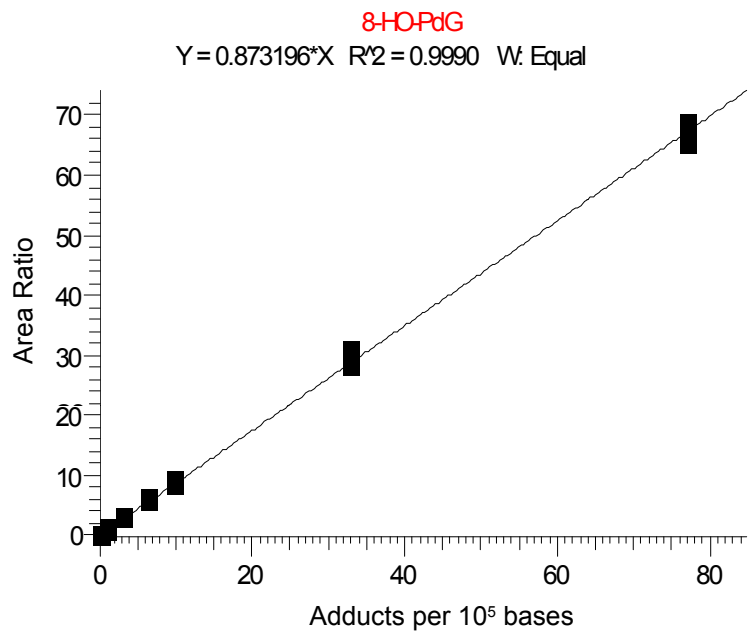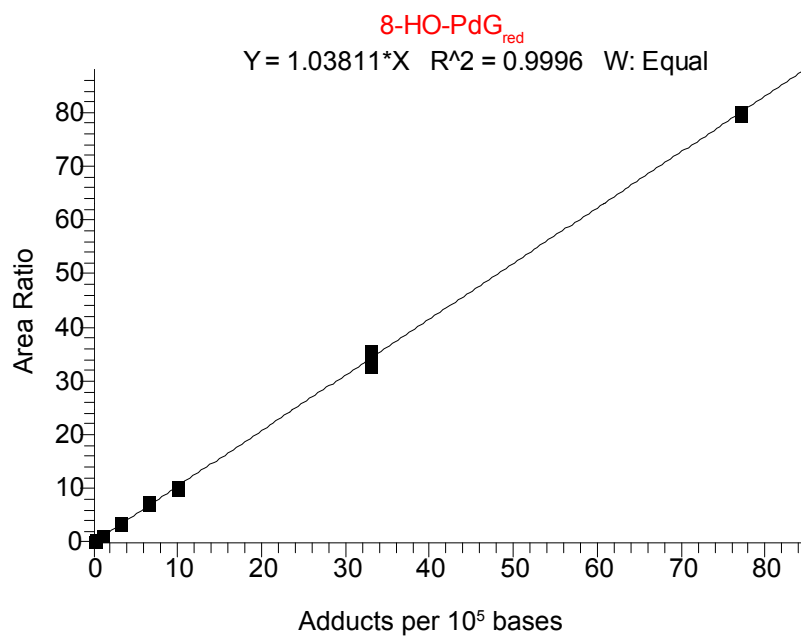

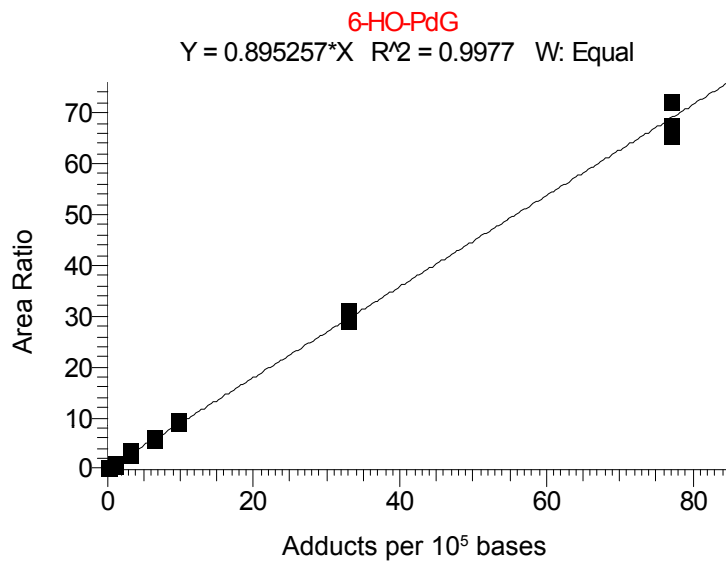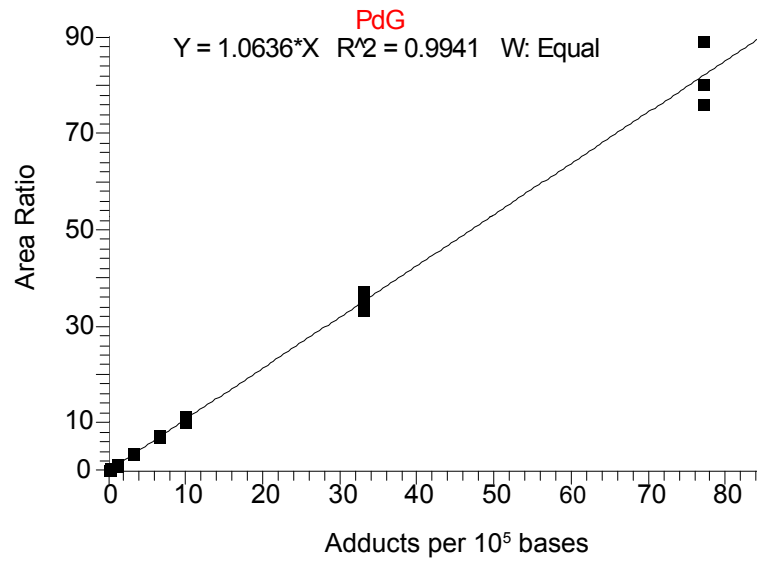

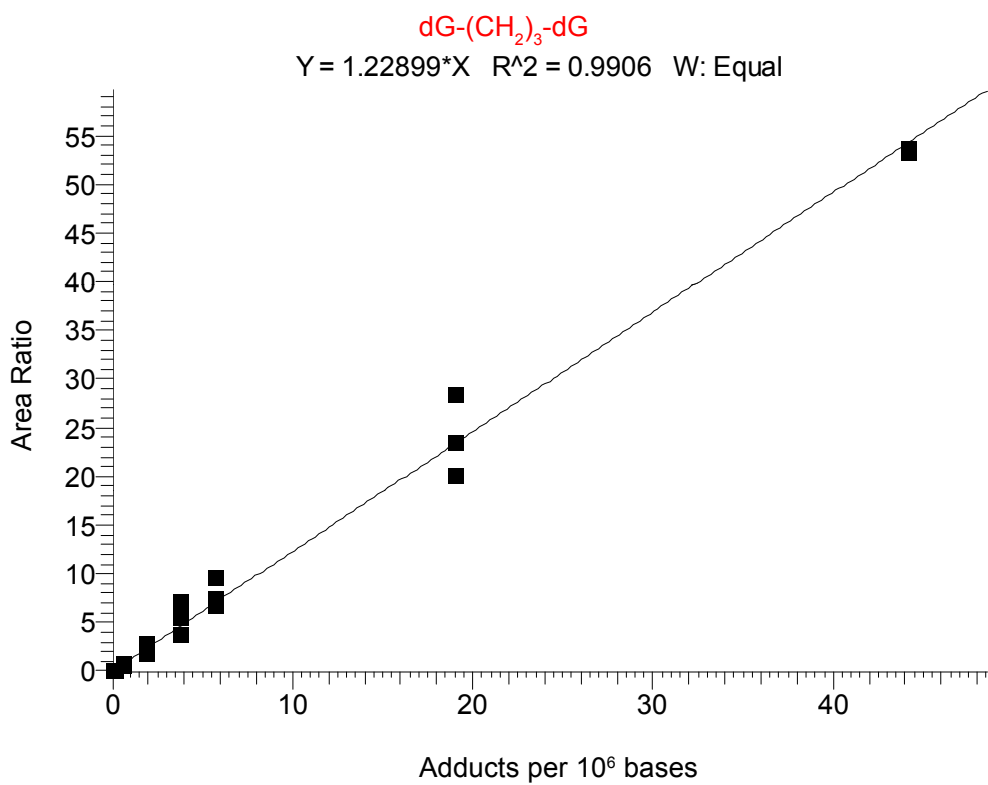

HNE-dG  
 $Y = 0.0720586 + 1.19914 * X - 0.0018197 * X^2$   $R^2 = 0.9976$  W: Equal

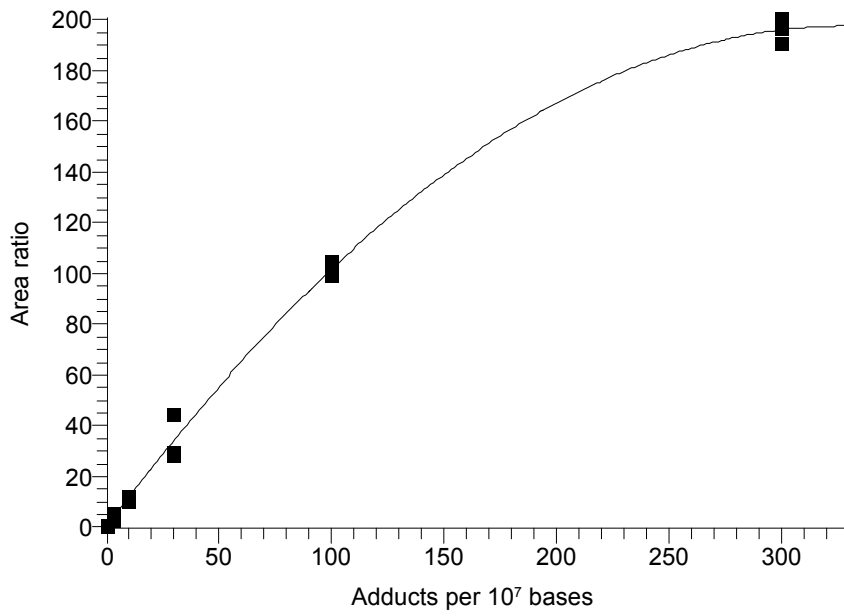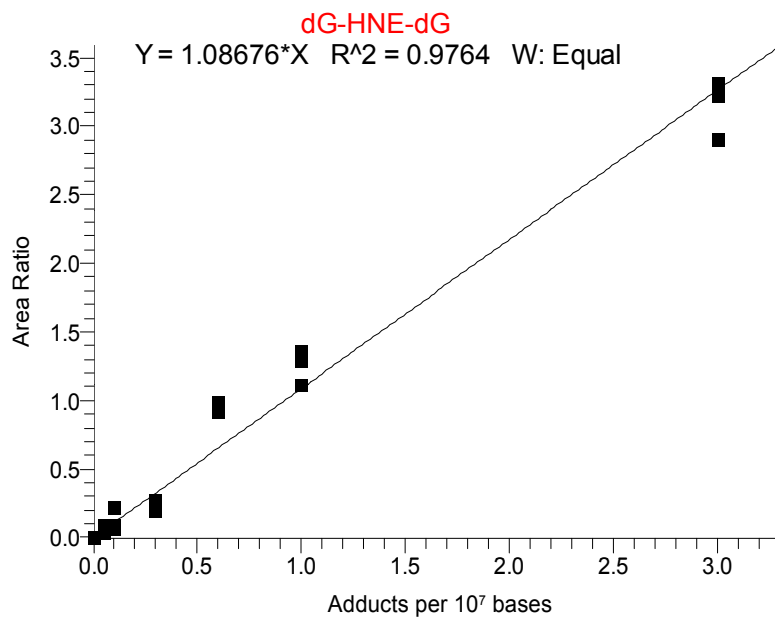

Figure S-2

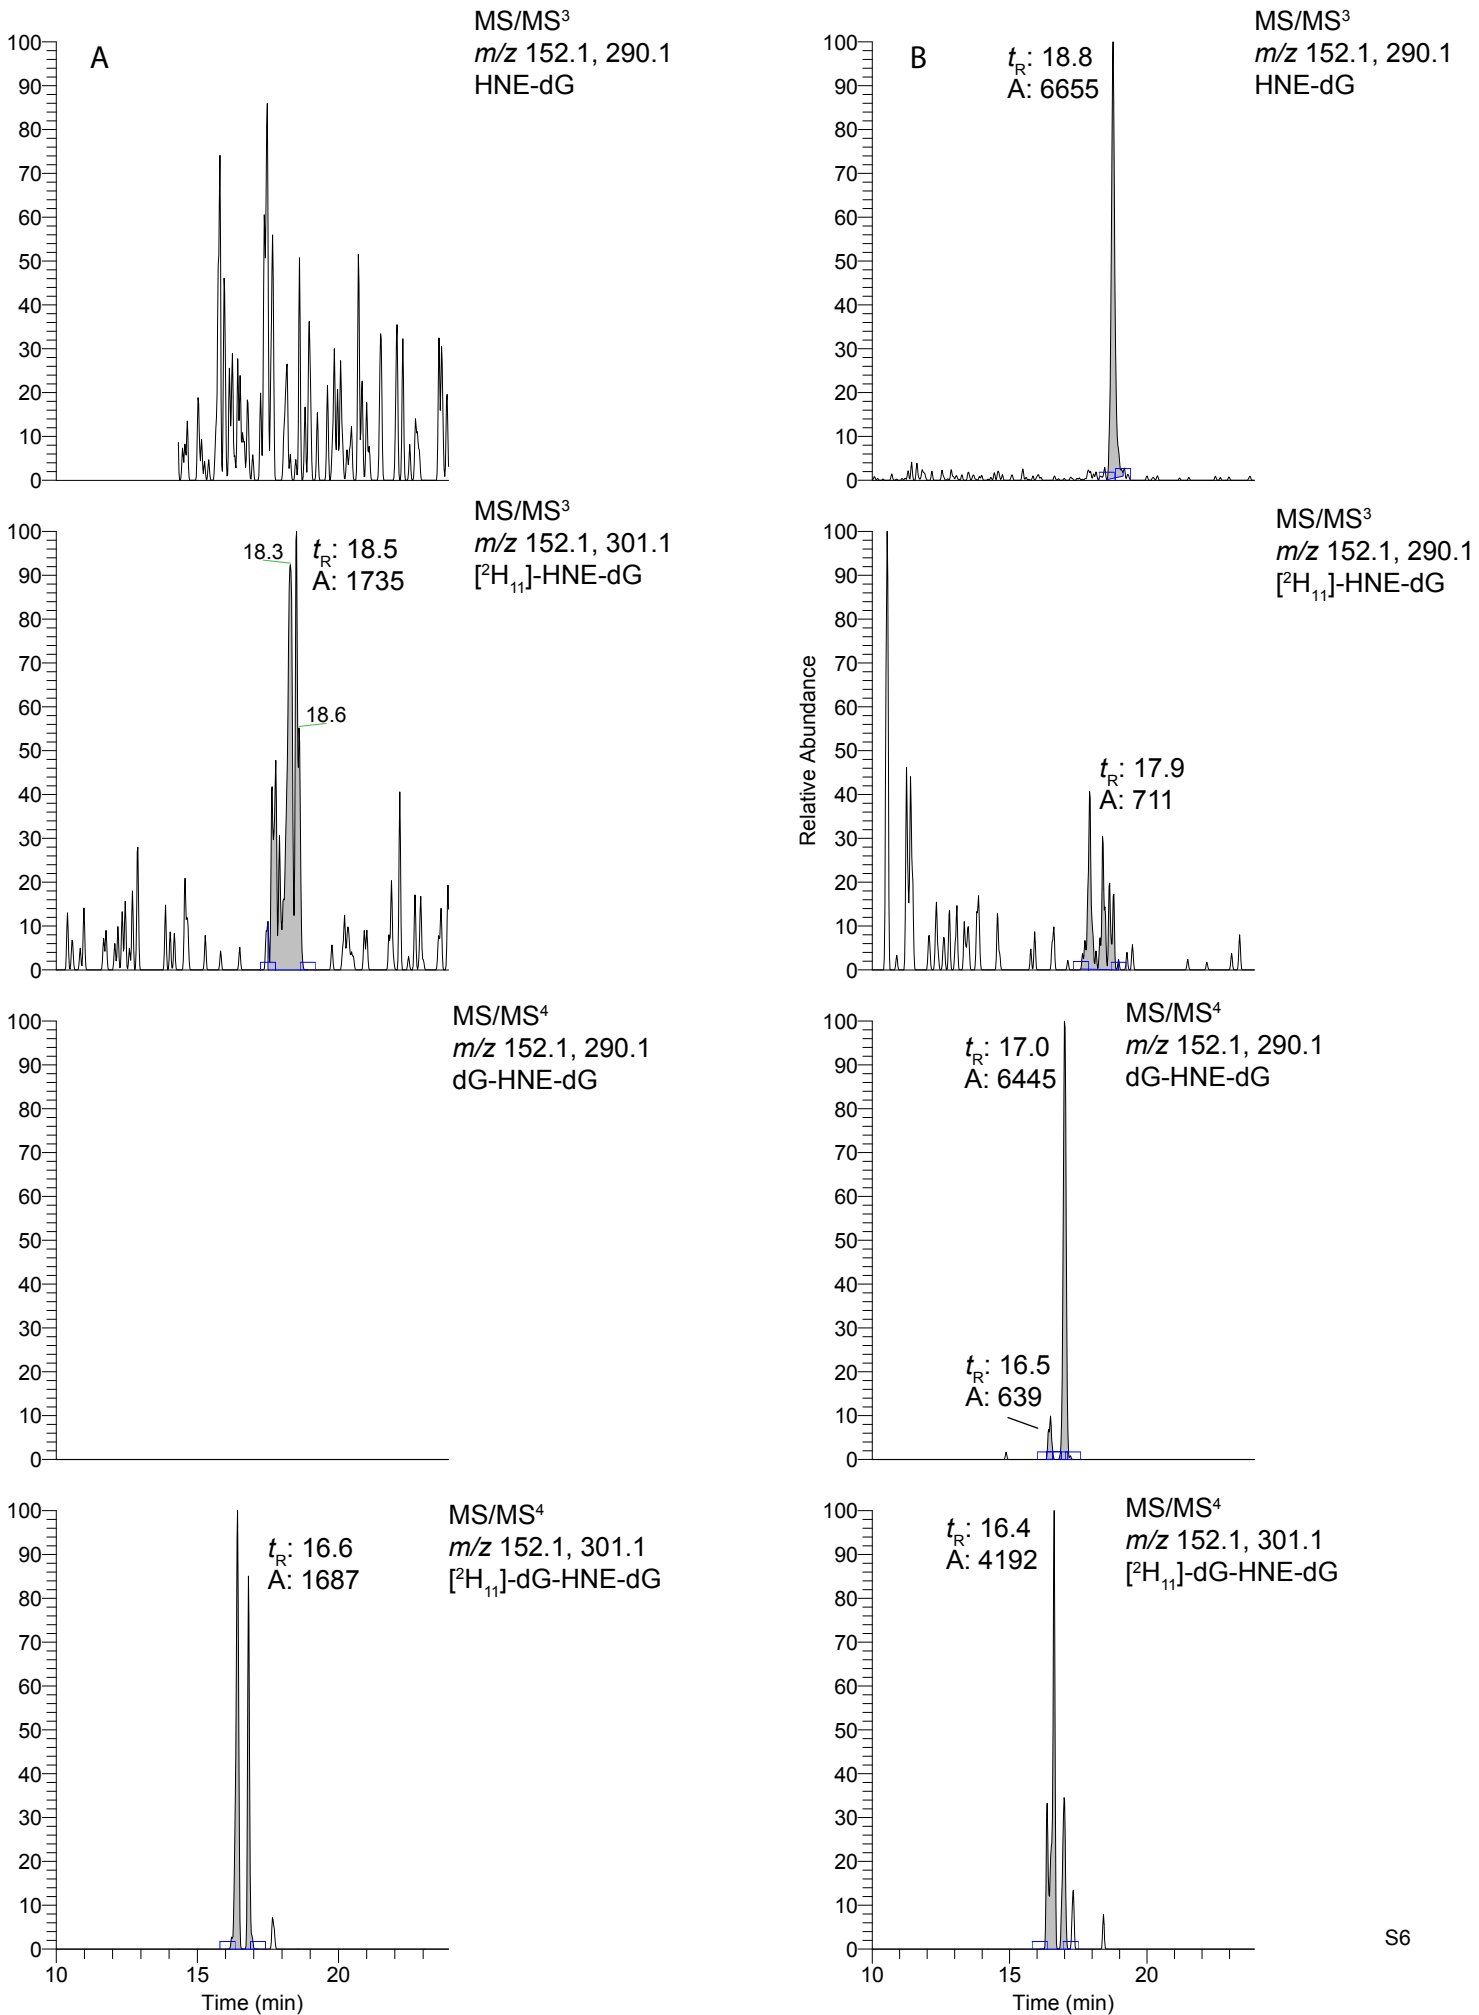

Supplement: NIHMS248105-supplement-1_si_001.pdf [file NIHMS248105-supplement-1_si_001.pdf]
